# Supplementary material
Source: PubMed Central journal article supplement (PMC529416)
Supplement: pnas_101_48_16789__1.pdf [file pnas_101_48_16789__1.pdf]

**Table 1. List of structures having short X...O contacts from a survey of the July 2004 release of the Protein Data Bank (PDB)**

| Bound group                                                  | Halogen | PDB code | Res., Å | $d$ , Å   | $\Theta_1$     | $\Theta_2$                   | $\Psi$                  |                         |
|--------------------------------------------------------------|---------|----------|---------|-----------|----------------|------------------------------|-------------------------|-------------------------|
| <u>Structures containing halogenated nucleotides</u>         |         |          |         |           |                |                              |                         |                         |
| P-O                                                          | Br      | 1RLG     | 2.7     | 3.12/3.13 | 174/161        | 104/114                      |                         |                         |
|                                                              |         | 1P54     | 1.9     | 3.03      | 169            | 117                          |                         |                         |
|                                                              |         | 376D     | 2.1     | 3.09      | 162            | 127                          |                         |                         |
|                                                              | I       | 454D     | 1.2     | 3.13/3.06 | 176/163        | 110/118                      |                         |                         |
|                                                              |         | 1UE2     | 1.4     | 3.14      | 168            | 115                          |                         |                         |
| C=O                                                          | Br      | 1J6S     | 1.4     | 2.99/2.95 | 158 /158       | 110/112                      |                         |                         |
| O2'-H                                                        | Br      | 1J6S     | 1.4     | 3.12      | 166            | 134                          |                         |                         |
| <u>Complexes with proteins involving halogenated ligands</u> |         |          |         |           |                |                              |                         |                         |
| C=O (peptide)                                                | Cl      | 1L7X     | 2.3     | 3.25      | 121            | 137                          | P                       |                         |
|                                                              |         | 1PMQ     | 2.2     | 2.96      | 160            | 90                           | P                       |                         |
|                                                              |         | 1PMN     | 2.2     | 2.82      | 159            | 96                           | P                       |                         |
|                                                              |         | 1LKD     | 1.7     | 3.02      | 164            | 131                          | P                       |                         |
|                                                              |         | 1KZN     | 2.3     | 3.19      | 144            | 107                          | P                       |                         |
|                                                              |         | 1QYE     | 2.1     | 2.91      | 142            | 101                          | P                       |                         |
|                                                              |         | 1LEV     | 2.2     | 3.10      | 161            | 137                          | P                       |                         |
|                                                              |         | 1M78     | 1.7     | 3.25/3.24 | 130/133        | 146/147                      | L/L                     |                         |
|                                                              |         | 1RHR     | 3.0     | 3.11      | 144            | 106                          | P                       |                         |
|                                                              |         | 1J3J     | 2.3     | 3.05/3.22 | 175/169        | 104/114                      | P/P                     |                         |
|                                                              |         | 1JW7     | 2.3     | 3.01      | 167            | 122                          | L                       |                         |
|                                                              |         | 1RRV     | 2.0     | 3.08      | 125            | 96                           | P                       |                         |
|                                                              |         | 1C1E     | 1.9     | 2.98/2.85 | 148/153        | 74/81                        | P/P                     |                         |
|                                                              |         | 1G3M     | 1.7     | 3.13      | 147            | 123                          | L                       |                         |
|                                                              |         | 1C14     | 2.0     | 3.25      | 173            | 115                          | L                       |                         |
|                                                              |         | 1G0N     | 2.0     | 3.09      | 164            | 85                           | P                       |                         |
|                                                              |         | 1S1W     | 2.7     | 3.23      | 156            | 97                           | P                       |                         |
|                                                              |         | 1VJF     | 2.5     | 3.13      | 157            | 125                          | L                       |                         |
|                                                              |         | 1IEI     | 2.5     | 3.15      | 157            | 99                           | P                       |                         |
|                                                              |         | Br       | 1N1G    | 2.5       | 3.28           | 128                          | 126                     | L                       |
|                                                              |         |          | 1GXZ    | 2.1       | 3.15           | 169                          | 122                     | L                       |
|                                                              |         |          | 1KI4    | 2.3       | 2.92/3.16      | 136/138                      | 142/122                 | L/P                     |
|                                                              |         |          | 1KGJ    | 2.3       | 3.29/3.35      | 138/150                      | 84/102                  | P/P                     |
|                                                              |         |          | 1E7B    | 2.4       | 3.21           | 151                          | 122                     | L                       |
|                                                              |         |          | 1E7C    | 2.4       | 3.17           | 149                          | 127                     | L                       |
|                                                              |         |          | 1RV1    | 2.3       | 3.05/3.14      | 163/160                      | 123/122                 | P/P                     |
|                                                              |         |          | 6STD    | 1.8       | 3.36/3.25/3.21 | 165/165/163                  | 83/86/87                | P/P/P                   |
|                                                              | 1SEZ    |          | 2.9     | 3.30      | 177            | 88                           | P                       |                         |
|                                                              | 1J91    |          | 2.2     | 3.30      | 164            | 106                          | P                       |                         |
|                                                              | 1P5E    |          | 2.2     |           |                |                              | L/P/P/P/L               |                         |
|                                                              |         |          |         |           |                | 3.00/2.90/3.2<br>3/2.87/3.04 | 169/165/14<br>4/177/172 | 154/132/11<br>0/121/151 |
|                                                              | I       | 1GJD     | 1.8     | 3.41      | 164            | 157                          | L                       |                         |
|                                                              |         | 1NQ0     | 2.4     | 3.32      | 173            | 124                          | P                       |                         |
|                                                              |         | 1NQ2     | 2.4     | 3.07      | 171            | 125                          | P                       |                         |
|                                                              |         | 1QK0     | 2.1     | 3.40      | 149            | 135                          | L                       |                         |
|                                                              |         | 1OPM     | 2.1     | 3.39      | 152            | 98                           | P                       |                         |

| Bound group                   | Halogen | PDB code | Res., Å | $d$ , Å        | $\Theta_1$  | $\Theta_2$  | $\Psi$ |
|-------------------------------|---------|----------|---------|----------------|-------------|-------------|--------|
|                               |         | 1SDW     | 1.9     | 3.45           | 149         | 96          | P      |
|                               |         | 1THA     | 2.0     | 3.44/3.24/3.21 | 173/161/145 | 113/114/84  | P/P/P  |
|                               |         | 1ETA     | 1.7     | 3.12/3.12      | 149/161     | 106/102     | P/P    |
|                               |         | 1ETB     | 1.7     | 3.26/3.23      | 160/161     | 93/92       | P/P    |
|                               |         | 1ICT     | 3.0     | 3.30/3.46/3.23 | 166/132/161 | 102/91/80   | P/P/P  |
|                               |         | 1IE4     | 2.5     | 3.06           | 158         | 101         | P      |
|                               |         | 1HKL     | 2.7     | 3.23/3.28/3.46 | 147/170/151 | 127/131/102 | L/L/P  |
|                               |         | 1HK2     | 2.8     | 3.29/3.33/3.21 | 152/162/144 | 130/130/114 | L/L/P  |
|                               |         | 1HK3     | 2.8     | 3.40/3.47/3.14 | 154/169/143 | 134/127/120 | L/L/P  |
|                               |         | 1HK4     | 2.4     | 3.20           | 132         | 114         | L      |
|                               |         | 1HK5     | 2.7     | 3.46           | 133         | 111         | L      |
|                               |         | 1KGI     | 1.8     | 3.08/3.08      | 130/154     | 95/103      | P/P    |
|                               |         | 1KED     | 2.2     | 2.84           | 167         | 90          | P      |
|                               |         | 2ROX     | 2.0     | 2.79/3.25      | 163/167     | 95/90       | P/P    |
|                               |         | 1F86     | 1.1     | 3.03/3.20      | 168/167     | 90/91       | P/P    |
|                               |         | 1LIJ     | 1.9     | 3.34           | 162         | 113         | P      |
| COO <sup>-</sup> (Asp/Glu)    | Cl      | 1H1R     | 2.0     | 2.83           | 140         | 111         |        |
|                               |         | 1CKP     | 2.0     | 3.04           | 130         | 97          |        |
|                               |         | 1J51     | 2.2     | 3.04           | 135         | 129         |        |
|                               | Br      | 1FVT     | 2.2     | 3.21           | 127         | 87          |        |
|                               |         | 1M5C     | 1.6     | 3.25           | 168         | 104         |        |
|                               | I       | 1ML7     | 1.2     | 3.29           | 174         | 108         |        |
| CONH <sub>2</sub> (Asn)       | Cl      | 1PZO     | 1.9     | 3.06           | 148         | 101         |        |
| SO <sub>4</sub> <sup>2-</sup> | I       | 2GSQ     | 2.2     | 3.04           | 124         | 119         |        |
| OH(Ser/Thr/Tyr)               | Cl      | 2GSS     | 1.9     | 3.09/3.07      | 169/164     | 114/114     |        |
|                               |         | 1PY2     | 2.8     | 3.06           | 139         | 161         |        |
|                               |         | 1GXF     | 2.7     | 3.12/3.14      | 149/146     | 108/112     |        |
|                               |         | 1VJ3     | 2.1     | 2.72           | 145         | 110         |        |
|                               |         | 1D8R     | 2.1     | 2.72           | 176         | 145         |        |
|                               | Br      | 1PWL     | 1.1     | 3.02           | 157         | 132         |        |
|                               |         | 1M5D     | 1.7     | 3.27           | 136         | 96          |        |
|                               |         | 1O27     | 2.3     | 3.24/3.20/3.13 | 120/121/121 | 114/110/113 |        |
|                               |         | 1THC     | 2.3     | 3.05           |             |             |        |
|                               |         | 1US0     | 0.7     | 2.97           | 153         | 132         |        |
|                               | I       | 1SO2     | 2.4     | 3.33/3.33      | 149/151     | 103/102     |        |
|                               |         | 1ICT     | 3.0     | 3.30           | 166         | 102         |        |

$\Psi$  corresponds to the N=C=O...X torsion angle for halogen bonds involving the carbonyl group of the peptide backbone (see Fig. 3d). P, Perpendicular interactions involving the  $\pi$  system of the C=O bond; L, interactions involving the lone pair electrons of the oxygen of the C=O bond; Res, resolution. For a definition of  $d$ ,  $\Theta_1$ , and  $\Theta_2$ , see Fig. 1.
